# Supplementary material
Source: MDPI journal article supplement (https://www.mdpi.com/2073-445X/10/8/832)
Supplement: s1 [file s1]

## Appendix A. Supplementary data

**Table S1.** Results of survey in Yuanping, Qingyuan and Kulun (The percentage of each item in N is in brackets)

| Socio-demographics and Perception indicator | Yuanping<br>N = 87 | Qingyuan<br>N = 90 | Kulun<br>N = 76 | Total N = 253 |
|---------------------------------------------|--------------------|--------------------|-----------------|---------------|
| <i>Gender</i>                               |                    |                    |                 |               |
| Male                                        | 48 (19.0)          | 61 (24.1)          | 55 (21.7)       | 164 (64.8)    |
| Female                                      | 39 (15.4)          | 29 (11.5)          | 21 (8.3)        | 89 (35.2)     |
| <i>Age</i>                                  |                    |                    |                 |               |
| 18–24                                       | 8 (3.1)            | 6 (2.3)            | 5 (1.8)         | 19 (7.2)      |
| 25–35                                       | 10 (3.9)           | 13 (5.4)           | 8 (3.1)         | 31 (12.4)     |
| 36–45                                       | 24 (9.4)           | 25 (9.9)           | 30 (11.8)       | 79 (31.1)     |
| 46–55                                       | 22 (8.6)           | 27 (10.6)          | 22 (8.6)        | 71 (27.8)     |
| 56–65                                       | 18 (7.1)           | 15 (5.9)           | 9 (3.5)         | 42 (16.5)     |
| >65                                         | 5 (1.8)            | 4 (1.4)            | 5 (1.8)         | 14 (5.0)      |
| <i>Education</i>                            |                    |                    |                 |               |
| No education                                | 9 (3.6)            | 6 (2.4)            | 6 (2.4)         | 21 (8.3)      |
| Basic                                       | 38 (15.0)          | 44 (17.4)          | 35 (13.8)       | 117 (46.2)    |
| Sec/Tech                                    | 39 (15.4)          | 40 (15.8)          | 34 (13.4)       | 113 (44.7)    |
| Tertiary                                    | 1 (0.4)            | 0 (0)              | 1 (0.4)         | 2 (0.8)       |
| <i>Marital Status</i>                       |                    |                    |                 |               |
| Single                                      | 5 (2.0)            | 10 (4.0)           | 7 (2.8)         | 22 (8.7)      |
| Married                                     | 79 (31.2)          | 78 (30.8)          | 69 (27.3)       | 226 (89.3)    |
| Divorce/Separated                           | 2 (0.8)            | 1 (0.4)            | 1 (0.4)         | 4 (1.6)       |
| Widowed                                     | 1 (0.4)            | 1 (0.4)            | 0 (0)           | 2 (0.8)       |
| <i>Per capita disposable income (Yuan)</i>  |                    |                    |                 |               |
| <5000                                       | 3 (1.2)            | 3 (1.2)            | 8 (3.1)         | 14 (5.5)      |
| 5000–7500                                   | 9 (3.6)            | 4 (1.2)            | 8 (3.1)         | 21 (8.3)      |
| 7501–10000                                  | 12 (4.7)           | 9 (3.6)            | 13 (5.1)        | 34 (13.4)     |
| 10001–15000                                 | 27 (10.7)          | 33 (13.0)          | 18 (7.1)        | 78 (30.8)     |
| 15001–20000                                 | 15 (5.9)           | 28 (11.1)          | 21 (8.3)        | 64 (25.3)     |
| >20000                                      | 21 (8.3)           | 14 (5.5)           | 8 (3.1)         | 43 (17.0)     |
| <i>Household size</i>                       |                    |                    |                 |               |
| 1–3                                         | 35 (13.8)          | 61 (24.1)          | 43 (17.0)       | 139 (54.9)    |
| 4–5                                         | 44 (17.4)          | 22 (8.7)           | 25 (9.9)        | 91 (36.0)     |
| >5                                          | 8 (3.2)            | 7 (2.8)            | 9 (3.6)         | 24 (9.5)      |
| <i>Size of farmland per capita (mu)①</i>    |                    |                    |                 |               |
| <1                                          | 9 (3.6)            | 12 (4.7)           | 3 (1.2)         | 24 (9.5)      |
| 1–3                                         | 32 (12.6)          | 33 (13.0)          | 8 (3.2)         | 73 (28.9)     |
| 3–5                                         | 17 (6.7)           | 25 (9.9)           | 14 (5.5)        | 56 (22.1)     |
| 5–10                                        | 19 (7.5)           | 17 (6.7)           | 30 (11.9)       | 66 (26.1)     |
| >10                                         | 10 (4.0)           | 3 (1.2)            | 21 (8.3)        | 34 (13.4)     |
| <i>Decreased rainfall</i>                   |                    |                    |                 |               |
| Disagree                                    | 20 (7.9)           | 35 (13.8)          | 7 (2.8)         | 62 (24.5)     |
| Neutral                                     | 34 (13.4)          | 38 (15.0)          | 28 (11.1)       | 100 (39.5)    |
| Agree                                       | 33 (13.0)          | 17 (6.7)           | 41 (16.2)       | 91 (35.9)     |
| <i>Increased maximum temperature</i>        |                    |                    |                 |               |
| Disagree                                    | 13 (5.1)           | 16 (6.3)           | 14 (5.6)        | 43 (17.0)     |
| Neutral                                     | 32 (12.6)          | 37 (14.6)          | 22 (8.7)        | 91 (35.9)     |

|                                           |           |           |           |            |
|-------------------------------------------|-----------|-----------|-----------|------------|
| Agree                                     | 42 (16.6) | 37 (14.6) | 40 (15.9) | 119 (47.1) |
| <i>Increased minimum temperature</i>      |           |           |           |            |
| Disagree                                  | 15 (5.9)  | 31 (12.3) | 19 (7.5)  | 65 (25.7)  |
| Neutral                                   | 33 (13.0) | 31 (12.3) | 25 (0.9)  | 89 (35.2)  |
| Agree                                     | 39 (15.4) | 28 (11.1) | 32 (12.6) | 99 (39.1)  |
| <i>Erratic rainfall</i>                   |           |           |           |            |
| Disagree                                  | 19 (7.5)  | 30 (11.9) | 17 (6.7)  | 66 (26.1)  |
| Neutral                                   | 31 (12.3) | 38 (15.0) | 20 (7.9)  | 89 (35.2)  |
| Agree                                     | 37 (14.6) | 22 (8.7)  | 39 (15.4) | 98 (38.7)  |
| <i>Prolonged and severe droughts</i>      |           |           |           |            |
| Disagree                                  | 10 (3.9)  | 39 (15.5) | 10 (3.9)  | 59 (23.3)  |
| Neutral                                   | 45 (17.8) | 37 (14.6) | 23 (9.1)  | 105 (41.5) |
| Agree                                     | 32 (12.6) | 14 (5.6)  | 43 (17.0) | 89 (35.2)  |
| <i>Frequent flood events</i>              |           |           |           |            |
| Disagree                                  | 34 (13.4) | 23 (9.1)  | 30 (11.9) | 87 (34.4)  |
| Neutral                                   | 12 (4.7)  | 23 (9.1)  | 34 (13.5) | 69 (27.3)  |
| Agree                                     | 41 (16.2) | 44 (17.3) | 12 (4.8)  | 97 (38.3)  |
| <i>Severe rainstorms</i>                  |           |           |           |            |
| Disagree                                  | 13 (5.1)  | 16 (6.3)  | 15 (5.9)  | 54 (21.3)  |
| Neutral                                   | 44 (17.4) | 45 (17.8) | 39 (15.4) | 128 (50.6) |
| Agree                                     | 30 (11.9) | 29 (11.5) | 22 (8.7)  | 81 (32.1)  |
| <i>Intensified heatwaves</i>              |           |           |           |            |
| Disagree                                  | 14 (5.5)  | 16 (6.4)  | 14 (5.5)  | 54 (21.4)  |
| Neutral                                   | 33 (13.0) | 37 (14.6) | 20 (7.9)  | 90 (35.5)  |
| Agree                                     | 40 (15.8) | 37 (14.6) | 42 (16.7) | 119 (47.1) |
| <i>Climate change is happening</i>        |           |           |           |            |
| Disagree                                  | 5 (1.9)   | 3 (1.2)   | 3 (1.2)   | 11 (4.3)   |
| Neutral                                   | 11 (4.3)  | 55 (21.7) | 4 (1.6)   | 70 (27.7)  |
| Agree                                     | 71 (28.1) | 32 (12.6) | 69 (27.3) | 172 (68.0) |
| <i>Countermeasures on climate change</i>  |           |           |           |            |
| Yes                                       | 36 (14.2) | 24 (9.5)  | 70 (27.7) | 130 (51.4) |
| No                                        | 51(20.1)  | 66(26.1)  | 6(2.4)    | 123(48.6)  |
| <i>Concrete measures (open questions)</i> |           |           |           |            |

①: Chinese dimension, 1 mu = 1/15ha
